# Supplementary material
Source: Research Square preprint supplement (doi:10.21203/rs.3.rs-9029042/v1)
Supplement: Supplementary file 1 [file 0de67de23bb8cf55577e6c6b.xlsx]

## Sheet: Sheet1
TABLE 4 Univariate and multivariate logistic regression analyses of variables associated with recurrence-free survival with hepatocellular carcinoma
Variables	n (%)	Univariate analysis		Multivariate analysis
		HR (95% CI)	P value	HR (95% CI)	*P value
Sex		0.596（0.380-0.936）	0.025	0.598（0.380-0.940）	0.026
Female	66（14.25）
Male	397（85.75）
Age, y		0.763（0.576-1.012）	0.06	NS
<60	283（61.12）
≥60	180（38.88）
Tumor size, cm		1.916（1.374-2.672）	＜0.001	1.763（1.247-2.492）	0.001
<3	133（28.73）
≥3	330（71.27）
Microvascular invasion		2.139（1.617-2.831）	＜0.001	1.627（1.199-2.208）	0.002
M0	344（74.30）
M1+M2	119（25.70）
No. of tumor lesions		1.649（1.200-2.266）	0.002	1.404（1.009-1.956）	0.044
Single	376（81.20）
Multiple	87（18.80）
Necrosis		1.506（1.143-1.984）	0.004	NS
Negative	210（45.36）
Positive	253（54.64）
Differentiation		1.558（1.157-2.099）	0.004	NS
Moderate/well	348（75.16）
Poor	115（24.84）
Liver capsule invasion		1.259（0.910-1.742）	0.165
Negative	375（80.99）
Positive	88（19.01）
Dual-phenotype hepatocellular carcinoma		1.479（1.076-2.032）	0.016	NS
Negative	370（79.91）
Positive	93（20.09）
Note: *P < 0.1 in univariable analysis were entered into multivariable Cox analysis.
Abbreviations: HR, hazard ratio; NS, no significance.
