# Supplementary material
Source: Research Square preprint supplement (doi:10.21203/rs.3.rs-9029042/v1)
Supplement: Supplementary file 2 [file 385ee8f21fbe00363f3af1df.xlsx]

## Sheet: Sheet1
TABLE 1 Patient pathological features (n =463 )
Pathological features	No. (%)
Sex
Female	66（14.25）
Male	397（85.75）
Age, y
<60	283（61.12）
≥60	180（38.88）
Tumor size, cm
<3	133（28.73）
≥3	330（71.27）
Microvascular invasion
M0	344（74.30）
M1+M2	119（25.70）
No. of tumor lesions
Single	376（81.20）
Multiple	87（18.80）
Necrosis
Negative	210（45.36）
Positive	253（54.64）
Differentiation
Moderate/well	348（75.16）
Poor	115（24.84）
Liver capsule invasion
Negative	375（80.99）
Positive	88（19.01）
Dual-phenotype hepatocellular carcinoma
Negative	370（79.91）
Positive	93（20.09）
