# Supplementary material
Source: Research Square preprint supplement (doi:10.21203/rs.3.rs-9029042/v1)
Supplement: Supplementary file 3 [file a7cf5ef8be23fdc7700fc3bd.xlsx]

## Sheet: Sheet2
TABLE 2 Comparison of pathological features between patients with DPHCC and CHCC
Pathological features	DPHCC，n (%)	CHCC，n (%)	P value
Patients, n (%)	93（20.1）	370（79.9）
Sex			0.214
Female	17（25.8）	49（74.2）
Male	76（19.1）	321（80.9）
Age, y			0.004
<60	69（24.4）	214（75.6）
≥60	24（13.3）	156（86.7）
Tumor size, cm			0.025
<3	18（13.5）	115（86.5）
≥3	75（22.7）	255（77.3）
Microvascular invasion			＜0.001
M0	52（15.1）	292（84.9）
M1+M2	41（34.5）	78（65.5）
No. of tumor lesions			＜0.001
Single	62（16.5）	314（83.5）
Multiple	31（35.6）	56（64.4）
Necrosis			＜0.001
Negative	22（10.5）	188（89.5）
Positive	71（28.1）	182（71.9）
Differentiation			＜0.001
Moderate/well	56（16.1）	292（83.9）
Poor	37（32.2）	78（67.8）
Liver capsule invasion			0.001
Negative	64（17.1）	311（82.9）
Positive	29（33.0）	59（67.0）
