# Supplementary material
Source: Research Square preprint supplement (doi:10.21203/rs.3.rs-9029042/v1)
Supplement: Supplementary file 4 [file d631717b151f68e3b0439e46.xlsx]

## Sheet: Sheet1
TABLE 5 Univariate and multivariate logistic regression analyses of variables associated with overall survival with dual-phenotype hepatocellular carcinoma
Variables	n (%)	Univariate analysis		Multivariate analysis
		HR (95% CI)	P value	HR (95% CI)	*P value
Sex		0.500（0.175-1.431）	0.196
Female	17（18.28）
Male	76（81.72）
Age, y		0.420（0.162-1.088）	0.074	NS
<60	69（74.19）
≥60	24（25.81）
Tumor size, cm		3.267（0.992-10.758）	0.05	5.850（1.250-27.380）	0.025
<3	18（19.35）
≥3	75（80.65）
Microvascular invasion		2.664（1.311-5.411）	0.007	NS
M0	52（55.91）
M1+M2	41（44.09）
No. of tumor lesions		2.073（1.053-4.081）	0.035	NS
Single	62（66.67）
Multiple	31（33.33）
Necrosis		2.848（0.996-8.140）	0.05	NS
Negative	22（23.66）
Positive	71（76.34）
Differentiation		2.245（1.138-4.428）	0.02	2.367（1.104-5.076）	0.027
Moderate/well	56（60.22）
Poor	37（39.78）
Liver capsule invasion		1.086（0.528-2.231）	0.823
Negative	64（68.82）
Positive	29（31.18）
CK19		4.656（2.104-10.303）	＜0.001	4.903（1.904-12.624）	0.001
Low expression	49（52.69）
High expression	44（47.31）
Note: *P < 0.1 in univariable analysis were entered into multivariable Cox analysis.
Abbreviations: HR, hazard ratio; NS, no significance;CK19,cytokeratin19.
