# Supplementary material
Source: Research Square preprint supplement (doi:10.21203/rs.3.rs-9029042/v1)
Supplement: Supplementary file 5 [file e7d90382652973465cab0a74.xlsx]

## Sheet: Sheet1
TABLE 6 Univariate and multivariate logistic regression analyses of variables associated with recurrence-free survival with dual-phenotype hepatocellular carcinoma
Variables	n (%)	Univariate analysis		Multivariate analysis
		HR (95% CI)	P value	HR (95% CI)	*P value
Sex		0.557（0.250-1.244）	0.153
Female	17（18.28）
Male	76（81.72）
Age, y		0.502（0.235-1.072）	0.075	NS
<60	69（74.19）
≥60	24（25.81）
Tumor size, cm		3.261（1.172-9.077）	0.024	3.554（1.150-10.986）	0.028
<3	18（19.35）
≥3	75（80.65）
Microvascular invasion		2.144（1.216-3.782）	0.008	NS
M0	52（55.91）
M1+M2	41（44.09）
No. of tumor lesions		1.591（0.887-2.852）	0.119
Single	62（66.67）
Multiple	31（33.33）
Necrosis		2.551（1.141-5.701）	0.022	NS
Negative	22（23.66）
Positive	71（76.34）
Differentiation		2.018（1.149-3.543）	0.015	1.911（1.044-3.496）	0.036
Moderate/well	56（60.22）
Poor	37（39.78）
Liver capsule invasion		1.040（0.566-1.912）	0.9
Negative	64（68.82）
Positive	29（31.18）
CK19		2.270（1.275-4.040）	0.005	NS
Low expression	49（52.69）
High expression	44（47.31）
Note: *P < 0.1 in univariable analysis were entered into multivariable Cox analysis.
Abbreviations: HR, hazard ratio; NS, no significance;CK19,cytokeratin19.
