# Supplementary material
Source: Research Square preprint supplement (doi:10.21203/rs.3.rs-9029042/v1)
Supplement: Supplementary file 6 [file f37b0968ac8a820e7823a1b3.xlsx]

## Sheet: Sheet1
TABLE 3 Univariate and multivariate logistic regression analyses of variables associated with overall survival with hepatocellular carcinoma
Variables	n (%)	Univariate analysis		Multivariate analysis
		HR (95% CI)	P value	HR (95% CI)	*P value
Sex		0.648（0.348-1.208）	0.172
Female	66（14.25）
Male	397（85.75）
Age, y		0.600（0.333-0.902）	0.014	0.633（0.417-0.962）	0.032
<60	283（61.12）
≥60	180（38.88）
Tumor size, cm		3.955（2.169-7.210）	＜0.001	3.579（1.930-6.637）	＜0.001
<3	133（28.73）
≥3	330（71.27）
Microvascular invasion		2.621（1.798-3.819）	＜0.001	1.588（1.047-2.410）	0.03
M0	344（74.30）
M1+M2	119（25.70）
No. of tumor lesions		2.022（1.340-3.051）	＜0.001	1.657（1.075-2.555）	0.022
Single	376（81.20）
Multiple	87（18.80）
Necrosis		1.980（1.327-2.954）	0.001	NS
Negative	210（45.36）
Positive	253（54.64）
Differentiation		2.568（1.754-3.759）	＜0.001	1.932（1.273-2.931）	0.002
Moderate/well	348（75.16）
Poor	115（24.84）
Liver capsule invasion		1.328（0.855-2.063）	0.206
Negative	375（80.99）
Positive	88（19.01）
Dual-phenotype hepatocellular carcinoma		2.113（1.406-3.175）	＜0.001	NS
Negative	370（79.91）
Positive	93（20.09）
Note: *P < 0.1 in univariable analysis were entered into multivariable Cox analysis.
Abbreviations: HR, hazard ratio; NS, no significance.
